# Supplementary material
Source: PubMed Central journal article supplement (PMC3227792)
Supplement: NIHMS317795-supplement-01.pdf [file NIHMS317795-supplement-01.pdf]

## Withdrawal from Chronic Nicotine Exposure Alters Dopamine Signaling Dynamics in the Nucleus Accumbens

### *Supplemental Information*

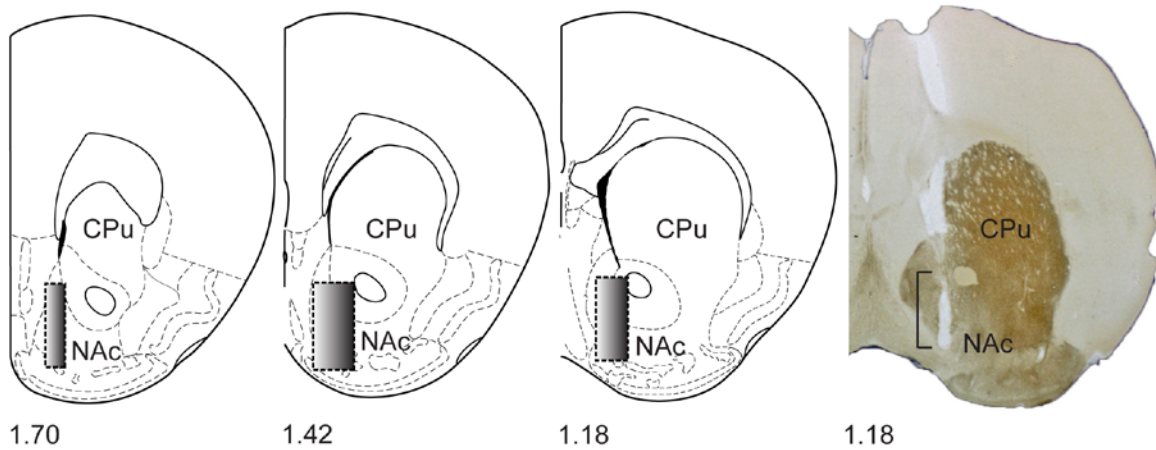

**Figure S1.** Anatomical illustration of the microdialysis probe placements within the medial nucleus accumbens (mainly the nucleus accumbens shell region) for all experiments combined. Microdialysis probes were located within the borders of the shaded rectangles. The photomicrograph to the right is a representative example of a microdialysis probe track within the designated region. The black bracket indicates the active sampling region (1 mm). Numerals denote the position of the coronal brain section (in millimeters) relative to bregma. CPu, caudate putamen; NAc, nucleus accumbens. The illustration was adapted from Paxinos and Franklin (1) and reprinted with permission.

1. Paxinos G, Franklin KBJ (2001): *The Mouse Brain in Stereotaxic Coordinates*. San Diego, CA: Academic Press.
